# Supplementary material for: Technosols Derived from Mining, Urban, and Agro-Industrial Waste for the Remediation of Metal(loid)-Polluted Soils: A Microcosm Assay
Source: MDPI journal article supplement (doi:10.3390/toxics11100854), 2023-10-12
Supplement: s1 [file s1]

## Supplementary Material

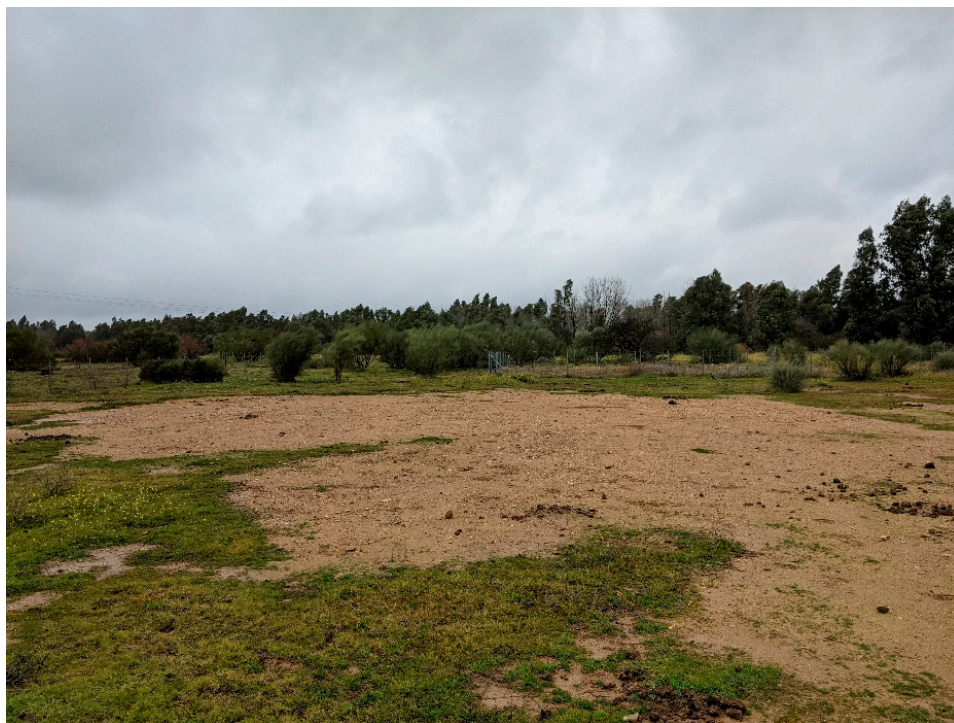

**Figure S1.** Residually polluted soils in the Guadamar Green Corridor (Seville, Spain) more than 25 years after the Aznalcóllar disaster.



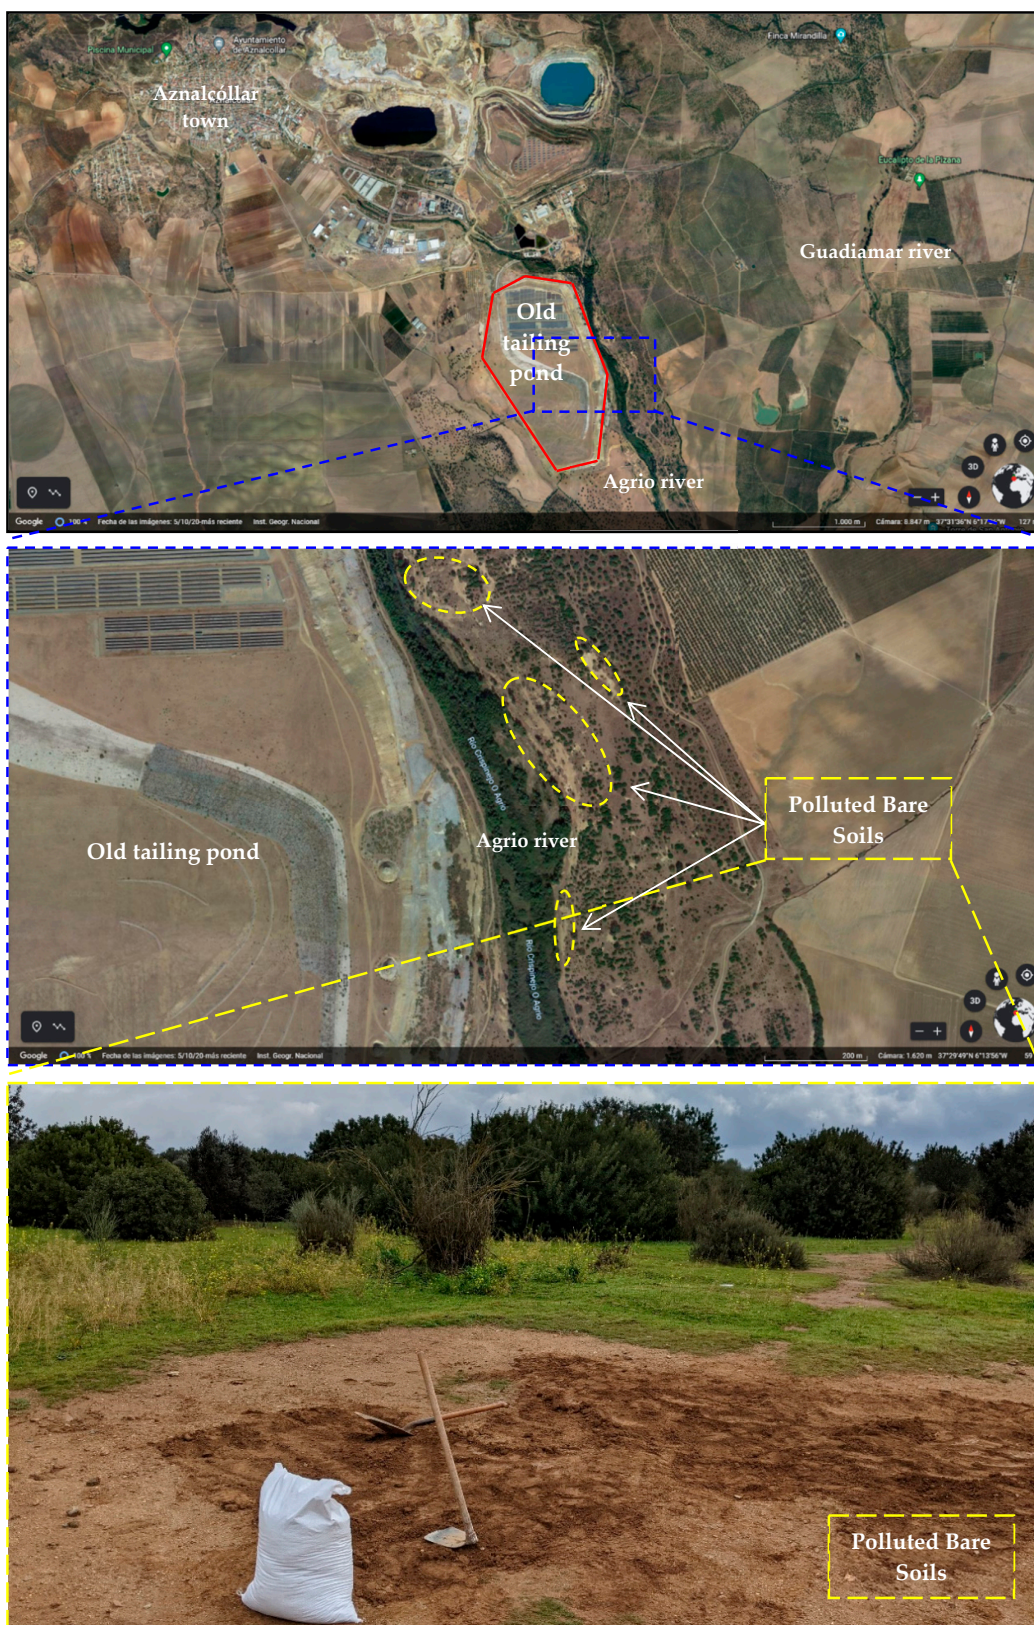

**Figure S2.** Identification of residually polluted soils, characterised by the absence of vegetation, in the proximity of the old tailings pond of the Aznalcóllar mine using satellite imagery.

**Table S1.** Main properties of the amendments used in the production of Technosols T1-T6 (IO, CW, MS, OL, WS, VC).

| <b>Waste</b> | <b>pH</b> (H <sub>2</sub> O) 1:2.5 | <b>EC</b> 1:5 (dS m <sup>-1</sup> ) | <b>OC</b> (%) | <b>CaCO<sub>3</sub></b> (%) | <b>CEC</b><br>(cmol <sup>+</sup> kg <sup>-1</sup> ) | <b>Ca<sup>2+</sup></b><br>(cmol <sup>+</sup> kg <sup>-1</sup> ) | <b>Mg<sup>2+</sup></b><br>(cmol <sup>+</sup> kg <sup>-1</sup> ) | <b>Na<sup>+</sup></b><br>(cmol <sup>+</sup> kg <sup>-1</sup> ) | <b>K<sup>+</sup></b><br>(cmol <sup>+</sup> kg <sup>-1</sup> ) | <b>N<sub>T</sub></b> (%) | <b>C<sub>T</sub></b> (%) | <b>Fe<sub>T</sub></b> (%) | <b>P<sub>A</sub></b> (mg kg <sup>-1</sup> ) | <b>BR</b><br>(μg CO <sub>2</sub> day <sup>-1</sup> kg <sup>-1</sup> ) |
|--------------|------------------------------------|-------------------------------------|---------------|-----------------------------|-----------------------------------------------------|-----------------------------------------------------------------|-----------------------------------------------------------------|----------------------------------------------------------------|---------------------------------------------------------------|--------------------------|--------------------------|---------------------------|---------------------------------------------|-----------------------------------------------------------------------|
| <b>IO</b>    | 7.27 ± 0.08                        | 0.04 ± 0.01                         | n.d.          | 13.68 ± 0.22                | 6.34 ± 0.38                                         | 4.44 ± 0.39                                                     | n.d.                                                            | 1.11 ± 0.03                                                    | 0.79 ± 0.01                                                   | n.d.                     | 1.55 ± 0.01              | 95.99 ± 0.88              | n.d.                                        | 45.91 ± 4.42                                                          |
| <b>CW</b>    | 7.83 ± 0.04                        | 2.81 ± 0.03                         | 1.34 ± 0.03   | 93.12 ± 0.72                | 14.70 ± 0.50                                        | 2.75 ± 0.80                                                     | 9.92 ± 0.67                                                     | 1.15 ± 0.04                                                    | 0.88 ± 0.01                                                   | 0.07 ± 0.02              | 12.51 ± 0.03             | 0.28 ± <0.01              | 470.83 ± 6.16                               | 124.05 ± 66.27                                                        |
| <b>MS</b>    | 8.27 ± 0.13                        | 1.13 ± 0.08                         | 0.16 ± 0.11   | 99.99 ± 0.01                | 9.34 ± 4.76                                         | 5.59 ± 4.60                                                     | 1.44 ± 0.27                                                     | 1.48 ± 0.13                                                    | 0.84 ± 0.02                                                   | n.d.                     | 11.81 ± 0.05             | 0.17 ± 0.01               | n.d.                                        | 29.46 ± 0.20                                                          |
| <b>OL</b>    | 8.63 ± 0.03                        | 3.67 ± 1.86                         | 28.08 ± 1.76  | 20.96 ± 1.25                | 90.72 ± 3.57                                        | 6.54 ± 2.00                                                     | 2.22 ± 0.13                                                     | 8.81 ± 0.03                                                    | 73.15 ± 1.75                                                  | 1.63 ± 0.28              | 30.60 ± 6.90             | 0.62 ± <0.01              | 318.70 ± 98.25                              | 70.70 ± 32.73                                                         |
| <b>WS</b>    | 7.16 ± 0.02                        | 10.13 ± 0.69                        | 21.95 ± 2.91  | 10.77 ± 0.92                | 55.11 ± 5.81                                        | 24.94 ± 1.07                                                    | 9.02 ± 0.71                                                     | 5.67 ± 0.31                                                    | 6.35 ± 0.19                                                   | 3.13 ± 0.09              | 23.37 ± 0.35             | 2.01 ± 0.09               | 401.53 ± 14.07                              | 13.95 ± 1.73                                                          |
| <b>VC</b>    | 7.35 ± 0.08                        | 0.39 ± 0.07                         | 10.50 ± 4.08  | 24.87 ± 1.30                | 35.83 ± 2.16                                        | 23.25 ± 2.00                                                    | 8.36 ± 0.24                                                     | 1.20 ± 0.02                                                    | 3.02 ± 0.04                                                   | 0.64 ± 0.02              | 12.44 ± 0.18             | 0.98 ± 0.13               | 226.94 ± 37.65                              | 82.96 ± 9.36                                                          |

IO – Iron oxyhydroxide-rich sludge, CW – Carbonated waste from peat extraction, MS –Marble cutting and polishing sludge, OL – Solid olive-mill by-product, WS – Composted sewage sludge, VC – Vermicompost from pruning and gardening, EC – Electric conductivity, OC – Organic carbon content, CaCO<sub>3</sub> - Calcium carbonate content, CEC Cation exchange capacity, N<sub>T</sub>/C<sub>T</sub>/Fe<sub>T</sub> - Total concentrations of N, C and Fe, P<sub>A</sub> – Assimilable phosphorus, BR – Basal respiration rate, n.d. - not detected. Extracted from [34].

**Table S2.** Retention effectiveness of metal(loid)s in simulated acid mine drainage of the amendments used in the production of Technosols T1-T6 (IO, CW, MS, OL, WS, VC).

|    | IO             | CW             | MS             | OL           | WS            | VC             |
|----|----------------|----------------|----------------|--------------|---------------|----------------|
| As | 99.96 ± 0.01   | 99.74 ± 0.07   | 99.53 ± 0.27   | 81.72 ± 3.04 | 69.56 ± 6.98  | 99.67 ± 0.01   |
| Ba |                | 33.81 ± 36.49  | 40.27 ± 4.17   |              |               |                |
| Be | 100.00 ± <0.01 | 100.00 ± <0.01 | 99.95 ± 0.09   | 62.80 ± 4.60 | 90.80 ± 2.04  | 99.74 ± 0.45   |
| Bi | 99.55 ± 0.24   | 97.93 ± 0.66   | 96.82 ± 1.43   | 92.16 ± 0.14 | 80.87 ± 8.10  | 99.76 ± 0.05   |
| Cd | 98.91 ± 0.04   | 99.68 ± 0.02   | 99.28 ± 0.02   | 94.85 ± 0.30 | 97.44 ± 0.30  | 98.54 ± 0.07   |
| Co | 98.80 ± 0.02   | 95.49 ± 0.22   | 64.25 ± 0.69   | 86.96 ± 0.47 | 83.57 ± 0.84  | 95.17 ± 0.59   |
| Cr | 100.00 ± <0.01 | 100.00 ± <0.01 | 100.00 ± <0.01 | 85.88 ± 1.63 | 83.52 ± 2.65  | 100.00 ± <0.01 |
| Cu | 99.93 ± 0.01   | 98.45 ± 0.01   | 99.46 ± 0.03   | 90.04 ± 0.60 | 92.49 ± 0.38  | 99.82 ± 0.01   |
| In | 100.00 ± <0.01 | 100.00 ± <0.01 | 99.94 ± 0.07   | 93.81 ± 0.58 | 91.86 ± 1.65  | 100.00 ± <0.01 |
| Mn | 98.02 ± 0.16   | 94.28 ± 0.30   | 78.43 ± 0.30   | 70.43 ± 1.03 | 73.12 ± 11.73 | 71.64 ± 2.50   |
| Mo | 3.45 ± 81.16   |                | 73.25 ± 2.85   |              |               |                |
| Ni | 85.30 ± 0.16   | 74.74 ± 0.54   | 62.98 ± 0.76   | 47.79 ± 1.65 | 19.98 ± 17.38 | 87.42 ± 1.24   |
| Pb | 100.00 ± <0.01 | 100.00 ± <0.01 | 99.97 ± 0.05   | 90.90 ± 1.46 | 93.19 ± 4.65  | 99.93 ± 0.01   |
| Sb | 99.33 ± 0.03   | 98.13 ± 0.10   | 98.55 ± 0.06   | 84.31 ± 0.30 | 62.07 ± 6.33  | 98.27 ± 0.12   |
| Sc | 91.83 ± 0.09   | 95.55 ± 0.13   | 97.35 ± 0.43   | 71.76 ± 1.01 | 77.58 ± 4.79  | 90.34 ± 0.76   |
| Sn | 100.00 ± <0.01 | 100.00 ± <0.01 | 99.38 ± 0.54   | 87.11 ± 0.91 | 43.34 ± 22.57 | 99.70 ± 0.42   |
| Th | 98.95 ± 0.51   | 95.51 ± 1.03   | 95.88 ± 0.92   | 51.68 ± 1.85 | 61.90 ± 8.95  | 99.03 ± 0.21   |
| Tl | 95.86 ± 0.03   | 91.47 ± 0.16   | 60.10 ± 0.77   | 83.24 ± 0.72 | 90.98 ± 2.91  | 91.70 ± 0.02   |
| U  | 80.20 ± 1.00   |                | 94.28 ± 0.17   | 71.68 ± 0.74 | 66.31 ± 7.12  | 94.28 ± 1.37   |
| V  | 100.00 ± <0.01 | 100.00 ± <0.01 | 100.00 ± <0.01 |              |               | 100.00 ± <0.01 |
| Y  | 99.93 ± 0.11   | 99.87 ± 0.22   | 99.92 ± 0.06   | 59.57 ± 2.14 | 79.26 ± 10.56 | 99.67 ± 0.06   |
| Zn | 99.22 ± 0.05   | 99.86 ± 0.01   | 93.63 ± 0.13   | 95.09 ± 0.36 | 95.17 ± 0.83  | 97.92 ± 0.19   |

IO – Iron oxyhydroxide-rich sludge, CW – Carbonated waste from peat extraction, MS –Marble cutting and polishing sludge, OL – Solid olive-mill by-product, WS – Composted sewage sludge, VC – Vermicompost from pruning and gardening. Adapted from [34].

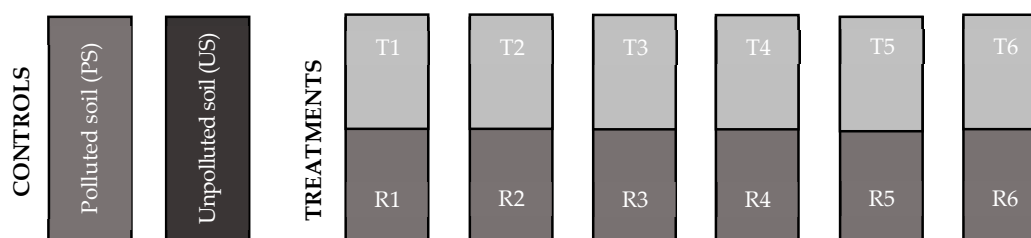

**Figure S3.** Diagram of the controls (PS and US) and rehabilitation treatments of the polluted soil with each of the Technosols (T1R1-T6R6).



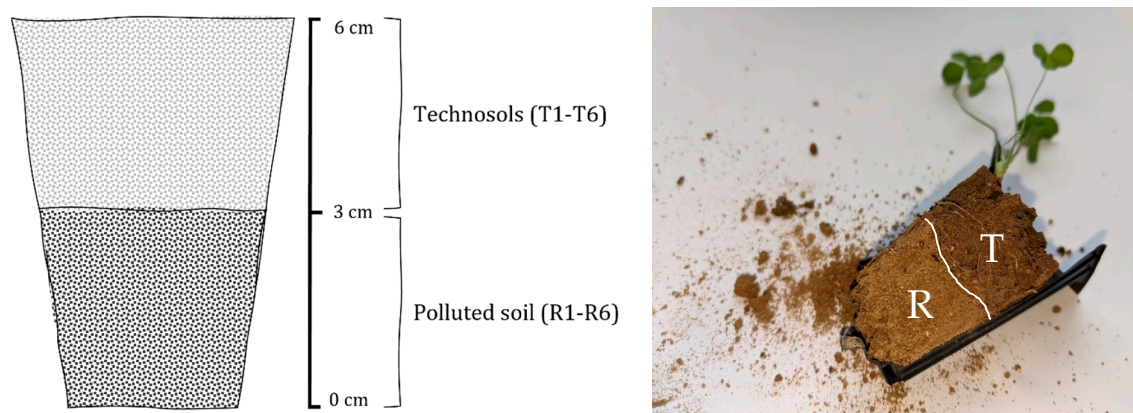

**Figure S4.** Scheme and close-up of the rehabilitation of polluted soils via surface application of Technosols (T1R1-T6R6).

**Table S3.** Results of the certified reference material of Loamy clay soil CRM 052-050 (RT-Corporation Limited, Salisbury, UK) analysed by X-ray fluorescence (XRF) with a portable NITON XL3t-980 GOLDD+ analyser (Thermo Fisher Scientific, Waltham, MA, Billerica, USA).

| Element | Certified value | Prediction interval |        | Measured value | LOD |
|---------|-----------------|---------------------|--------|----------------|-----|
|         |                 | Low                 | High   |                |     |
| As      | 14.60 (1.71)    | 10.90               | 18.30  | 15.53 (3.96)   | 7   |
| Cd      | 35.60 (1.89)    | 31.60               | 39.60  | 41.15 (4.96)   | 12  |
| Cu      | 44.20 (3.11)    | 37.60               | 50.80  | 48.51 (8.01)   | 13  |
| Fe      | 12,400 (1,170)  | 9,870               | 14,900 | 11,187 (96)    | N/A |
| Pb      | 82.60 (5.10)    | 71.80               | 93.40  | 92.62 (4.84)   | 8   |
| Sb      | 20.10 (6.23)    | 6.13                | 34.20  | 30.25 (5.42)   | 20  |
| Zn      | 89.00 (8.56)    | 70.90               | 107.00 | 94.41 (6.23)   | 10  |

Measured values are the mean of 6 replicates and standard error in parentheses. The limits of detection (LOD) are also shown. All values are given in mg kg<sup>-1</sup>. N/A: Not applicable.

**Table S4.** Results of the certified reference material of Loamy clay soil CRM 052-050 (RT-Corporation Limited, Salisbury, UK) analysed by ICP-MS PerkinElmer® NexION™ 300D (Waltham, MA, USA).

| Element | Certified value | Measured value | % (+/-) |
|---------|-----------------|----------------|---------|
| As      | 14.60           | 12.80          | -12     |
| Cd      | 35.60           | 31.60          | -11     |
| Cu      | 44.20           | 32.70          | -26     |
| Pb      | 82.60           | 74.80          | -9      |
| Sb      | 20.10           | 23.73          | +18     |
| Zn      | 89.00           | 77.00          | -13     |

Measured values are the mean of 6 replicates. All values are given in mg kg<sup>-1</sup>.

**Table S5.** Principal component analysis (PCA) after Varimax rotation with Kaiser normalization including soil properties [pH, electrical conductivity (EC), organic carbon (OC) and CaCO<sub>3</sub> content, and total nitrogen and carbon (N<sub>T</sub>, C<sub>T</sub>)], total (T), water-soluble (W), and EDTA-bioavailable (E) concentrations of metal(loid)s, soil enzymatic activities (dehydrogenase,  $\beta$ -glucosidase, acid phosphatase, and cellulase), and endpoints calculated from *T. campestris* (survival and biomass) and *L. sativa* [seed germination (SG) and root elongation (RE)] toxicity bioassays. Only coefficients above  $\pm 0.5$  were included.

|                      | Comp. 1 | Comp. 2 | Comp. 3 |
|----------------------|---------|---------|---------|
| pH                   | 0.834   | -0.505  |         |
| EC                   |         | 0.879   |         |
| OC                   |         |         | 0.868   |
| CaCO <sub>3</sub>    | 0.892   |         |         |
| N <sub>T</sub>       |         |         | 0.938   |
| C <sub>T</sub>       | 0.683   |         | 0.694   |
| As <sub>T</sub>      |         | 0.939   |         |
| Cu <sub>T</sub>      |         | 0.649   | 0.655   |
| Pb <sub>T</sub>      |         | 0.943   |         |
| Sb <sub>T</sub>      |         | 0.638   | -0.654  |
| Zn <sub>T</sub>      |         |         | 0.684   |
| As <sub>w</sub>      | 0.836   |         | 0.534   |
| Cd <sub>w</sub>      | -0.615  | 0.728   |         |
| Cu <sub>w</sub>      | -0.612  | 0.760   |         |
| Pb <sub>w</sub>      |         |         | 0.799   |
| Sb <sub>w</sub>      | 0.954   |         | 0.502   |
| Zn <sub>w</sub>      | -0.609  | 0.722   |         |
| As <sub>E</sub>      | 0.748   |         |         |
| Cd <sub>E</sub>      | -0.881  |         |         |
| Cu <sub>E</sub>      | -0.662  | 0.658   |         |
| Pb <sub>E</sub>      | -0.555  | -0.768  |         |
| Sb <sub>E</sub>      | 0.945   |         |         |
| Zn <sub>E</sub>      | -0.825  |         |         |
| Dehydrogenase        |         |         | 0.873   |
| $\beta$ -glucosidase |         | -0.760  | -0.570  |
| Acid phosphatase     | 0.517   |         |         |
| Cellulase            |         | -0.518  |         |
| Survival             |         | -0.520  | -0.533  |
| Biomass              |         | -0.655  | -0.533  |
| SG                   |         |         | -0.613  |
| RE                   | 0.648   | -0.682  |         |
| % ac. ex. var.       | 39.76   | 65.61   | 81.44   |
